# Supplementary material for: Fluorescent Polypropylene Nanoplastics for Studying Uptake, Biodistribution, and Excretion in Zebrafish Embryos
Source: PubMed Central journal article supplement — ACS Omega. 2022 Jan 4;7(2):2467–73. doi: 10.1021/acsomega.1c06779 (PMC8771955; doi:10.1021/acsomega.1c06779), 2022-01-04
Supplement: ao1c06779_si_001.pdf [file ao1c06779_si_001.pdf]

## Supporting Information

### **Fluorescent polypropylene nanoplastics for studying uptake, biodistribution, and excretion in zebrafish embryos**

Wang Sik Lee,<sup>1</sup> Hyunjung Kim,<sup>1</sup> Yugyeong Sim,<sup>1,2</sup> Taejoon Kang,<sup>3</sup> and Jinyoung Jeong<sup>1,2\*</sup>

<sup>1</sup>Environmental Disease Research Center, Korea Research Institute of Bioscience and  
Biotechnology (KRIBB), 125 Gwahak-ro, Yuseong-gu, Daejeon 34141, Republic of Korea

<sup>2</sup>Department of Nanobiotechnology, KRIBB School of Biotechnology, University of Science  
and Technology (UST), 217 Gajeong-ro, Yuseong-gu, Daejeon 34113, Republic of Korea

<sup>3</sup>Bionanotechnology Research Center, Korea Research Institute of Bioscience and  
Biotechnology (KRIBB), 125 Gwahak-ro, Yuseong-gu, Daejeon 34141, Republic of Korea

Corresponding author: Jinyoung Jeong (jyjeong@kribb.re.kr)

## **Experimental section**

### **Quantitative analysis of R-PPNPs in zebrafish embryos (ZFEs)**

We employed the fluorescence intensity of RBITC-labeled PPNPs (R-PPNPs) in a quantitative relationship model to determine the amount of R-PPNPs remaining in ZFEs. To do so, ZFEs were treated with 50 ppm R-PPNPs at 72 hpf for 24 h and then washed 3 times with fresh EW and fixed with 4% paraformaldehyde at 96 hpf and 120 hpf. Each ZFE was homogenized, and the fluorescence intensity was measured. The amounts of R-PPNPs in ZFEs were calculated by adjusting the standard curve.

Table S1. The yield of PPNPs production by NIPS method

| Number | Mass (mg) |     | Yield (%) | Average |
|--------|-----------|-----|-----------|---------|
|        | In        | Out |           |         |
| 1      | 130       | 100 | 76.9%     | 84.1%   |
| 2      | 130       | 100 | 76.9%     |         |
| 3      | 260       | 230 | 88.5%     |         |
| 4      | 1040      | 980 | 94.2%     |         |

Table S2. DSC melting results of PP pellets and PPNPs

| <b>Samples</b> | <b>T<sub>c</sub> (°C)</b> | <b>T<sub>m-low</sub> (°C)</b> | <b>T<sub>m-high</sub> (°C)</b> | <b>ΔH<sub>f</sub> (J/g)</b> | <b>X<sub>DSC</sub> (%)</b> |
|----------------|---------------------------|-------------------------------|--------------------------------|-----------------------------|----------------------------|
| PP pellets     | 115.40                    | 147.53                        | 156.52                         | 102.39                      | 49.44                      |
| PPNPs          | 120.87                    | 149.54                        | 156.64                         | 105.31                      | 50.85                      |

Table S3. Mortality and deformity of PPNPs and R-PPNPs-treated ZFEs ( $P > 0.05$ )

| Conc. (ppm) |    | Mortality rate (%) |           | Deformity rate (%) |           |
|-------------|----|--------------------|-----------|--------------------|-----------|
|             |    | at 48 hpf          | at 96 hpf | at 48 hpf          | at 96 hpf |
| R-PPNPs     | 0  | 13.33 ± 5.77       | 0.00      | 3.33 ± 5.77        | 0.00      |
|             | 50 | 13.33 ± 5.77       | 0.00      | 6.66 ± 5.77        | 0.00      |
| PPNPs       | 0  | 6.66 ± 5.77        | 0.00      | 0.00               | 0.00      |
|             | 50 | 0.00               | 0.00      | 3.33 ± 5.77        | 0.00      |

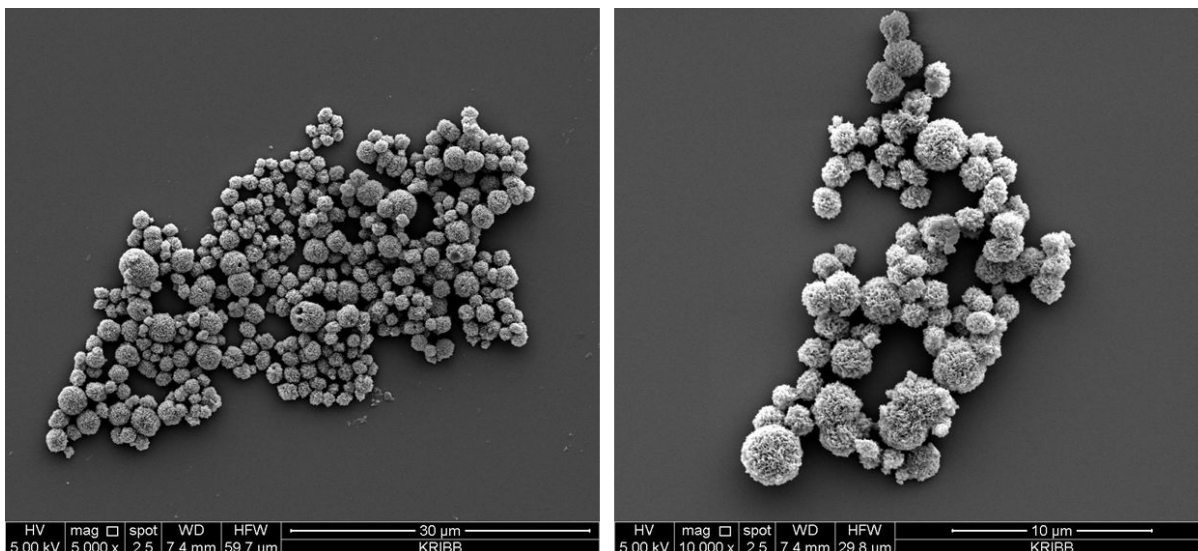

Figure S1. SEM images of PPNPs prepared by NIPS method using distilled water as a non-solvent.

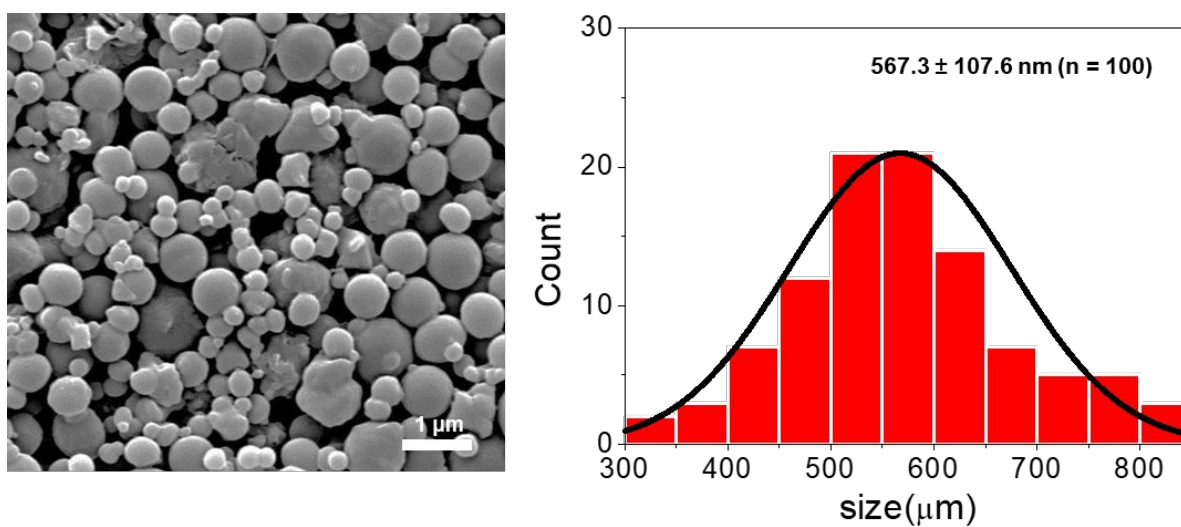

Figure. S2. SEM images of R-PPNPs and its size distribution.

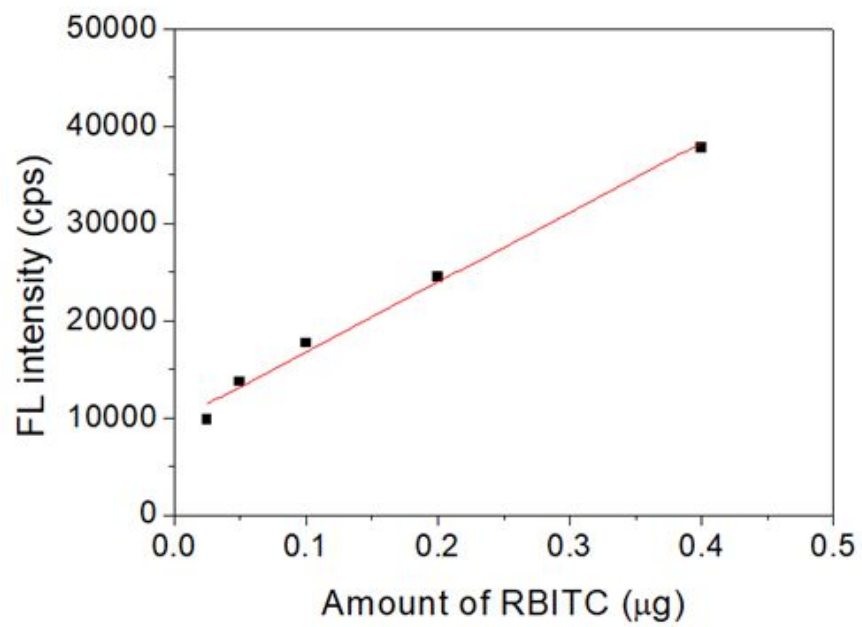

Figure S3. Standard curve for fluorescence intensity of RBITC by concentration.

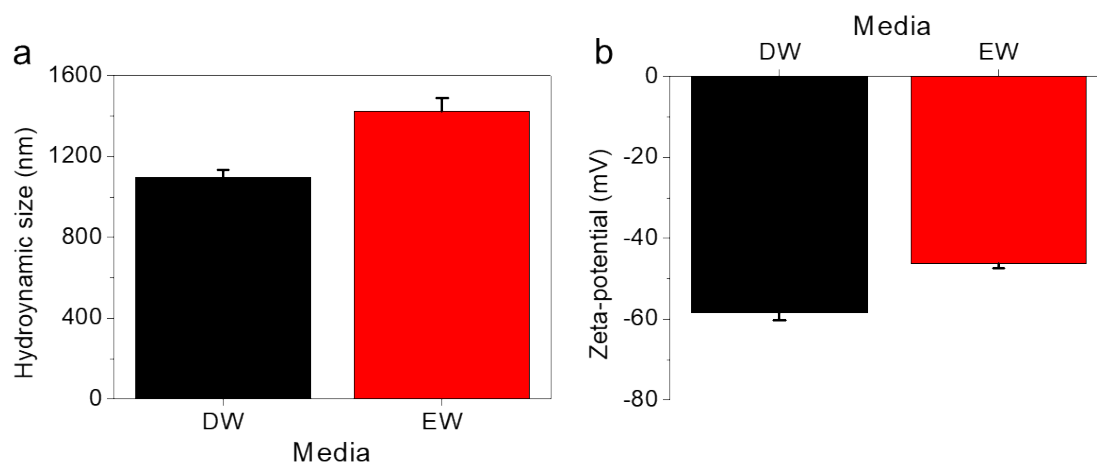

Figure S4. (a) Hydrodynamic size and (b) Zeta-potential values of PPNPs by different media (DW and EW)



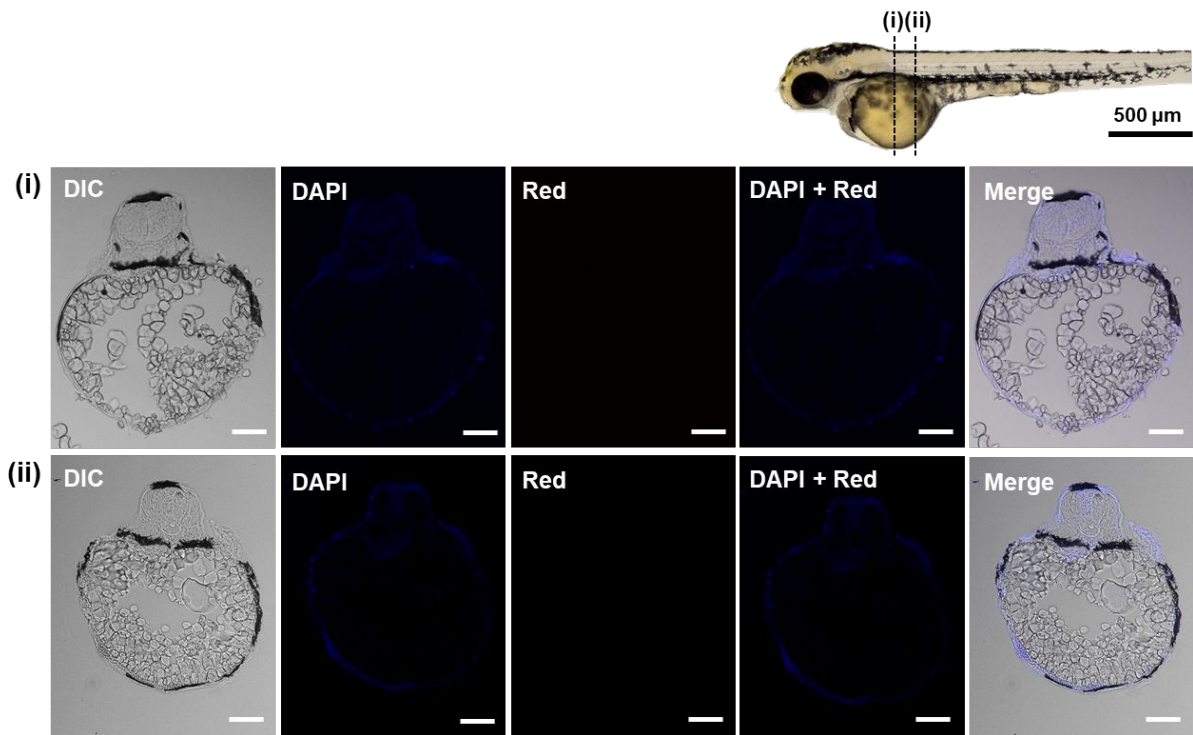

Figure S5. Cross-sectional images of the yolk sac (The point of dash line in top image i , ii ) in ZFEs at 48 hpf after R-PPNPs exposure at 24 hpf for 24 h with three different filters such as DIC, DAPI, and Red.

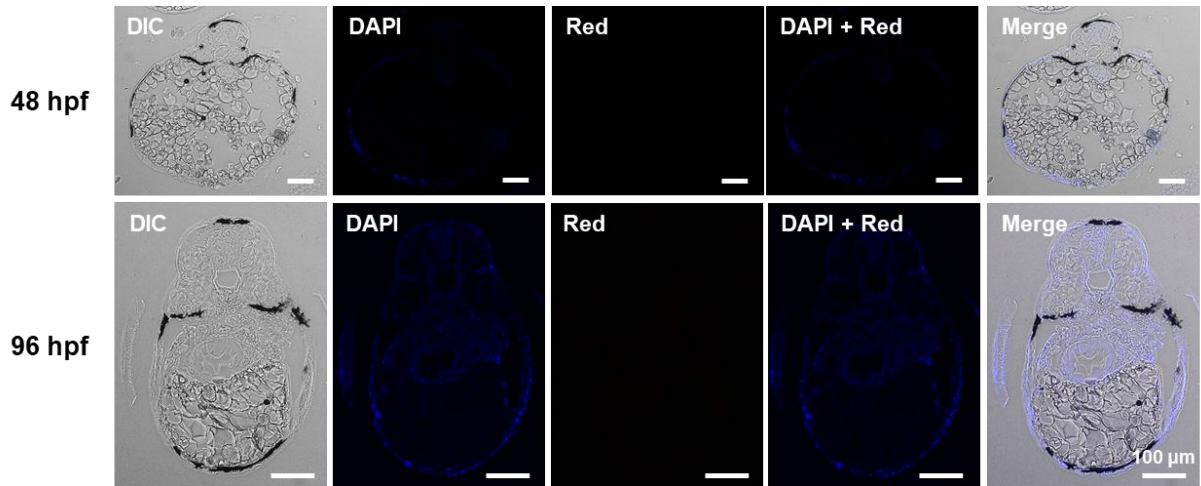

Figure S6. Cross-sectional images of control ZFEs at 48 hpf and 96 hpf with three different filters such as DIC, DAPI, and Red.

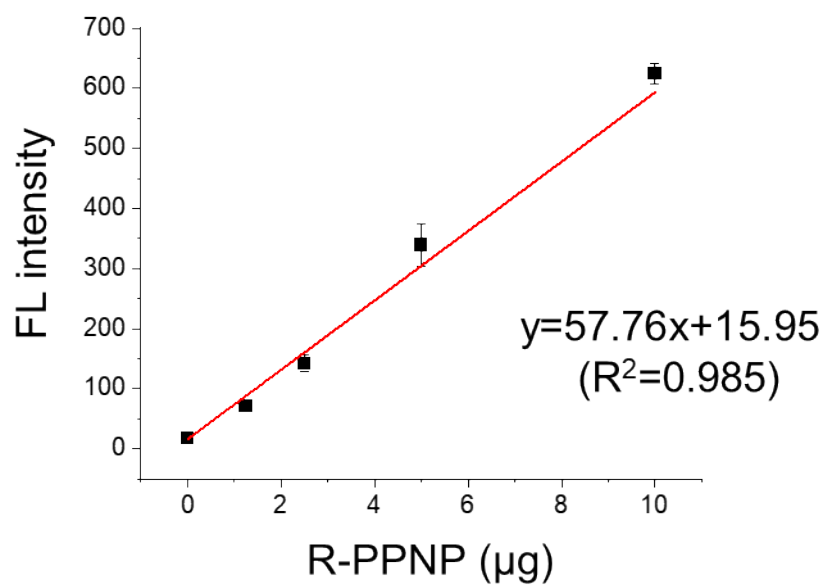

| (n=5)   | 96 hpf                    | 120 hpf                   |
|---------|---------------------------|---------------------------|
| Control | 0.00 ± 0.05 µg/individual | 0.00 ± 0.00 µg/individual |
| R-PPNP  | 1.01 ± 0.09 µg/individual | 0.46 ± 0.10 µg/individual |

Figure S7. Standard curve and amount of R-PPNPs measured by fluorescent microplate reader (Cytation 5, BioTek, USA) under excitation/emission at 540/580 nm.
